# Supplementary material
Source: Springer Nature journal article supplement (https://www.springermedizin.de/resource/supplementary/12885_2009_1900_MOESM5_ESM.pdf/9460054)

PIK3CA\_6

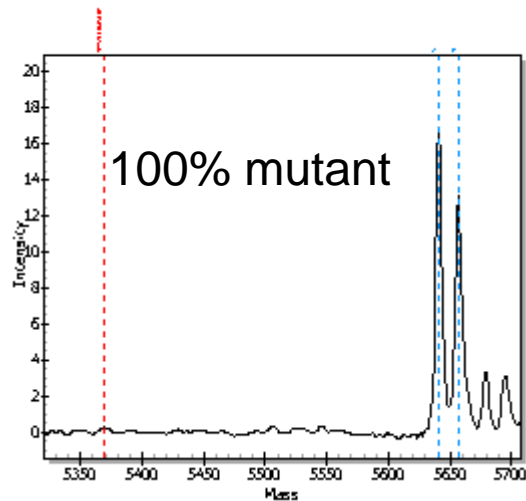

PIK3CA\_6

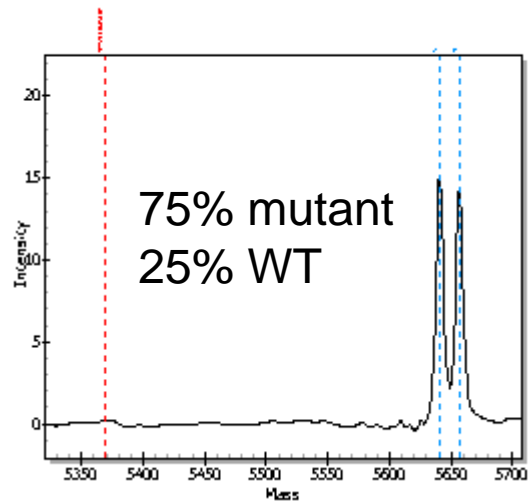

PIK3CA\_6

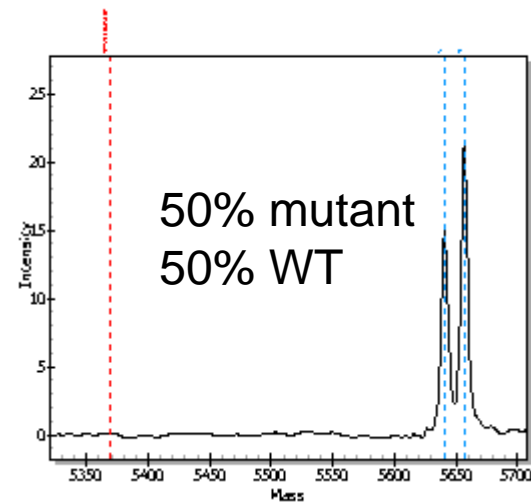

PIK3CA\_6

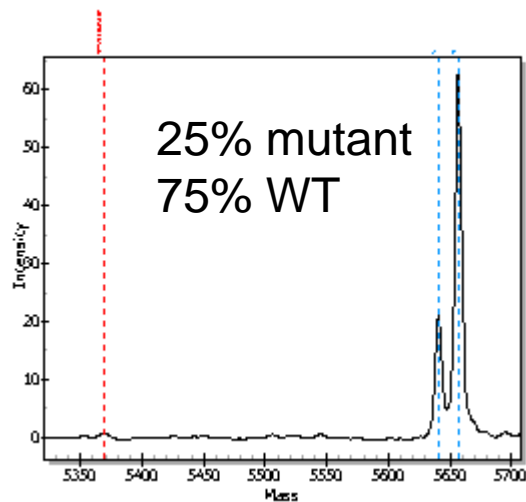

PIK3CA\_6

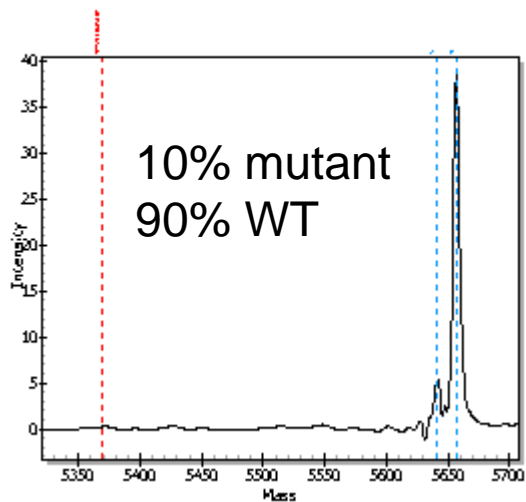

PIK3CA\_6

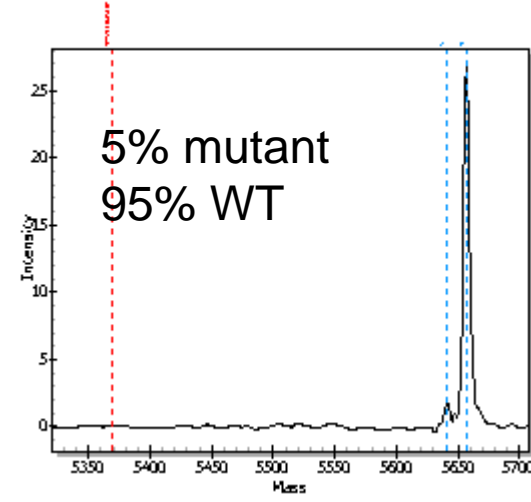

Supplement: MOESM5 [file 9460054]
